# Supplementary material
Source: publisher figshare collection journal article supplement (https://gsajournals.figshare.com/ndownloader/files/15302921)
Supplement: Supplementary file 1 [file 15302921]

## Sheet: Gene_Expression
id	genotype	sex	bco1_skin	bco2_skin	bco1_live	bco2_liver	bco1_adipose	bco2_adipose	bco1_muscle	bco2_muscle	bco1_duodenum	bco2_duodenum
4405	GG	m	1.48275	3.30467	0.640417	0.693308	0.754041	1.09611	0.865363	1.39535	0.874132	0.60035
4407	AA	m	0.430259	0.0037719	0.890127	0.940545	1.0194	0.87502	0.886613	0.562772	1.22625	0.462933
4409	GG	m	0.749124	0.803576	0.902552	0.774624	0.974487	0.672398	0.61616	1.05747	1.73418	0.7434
4418	AA	m	0.789098	0.00614874	0.810611	1.21552	1.03363	0.833577	1.22806	0.510727	0.794209	0.569938
4420	AA	m	0.716122	0.00509927	1.72558	2.00218	0.848341	1.23318	0.553393	0.519654	NA	NA
4421	AA	f	1.03403	0.00706305	1.06591	1.38662	1.24204	0.513127	1.16989	1.07596	0.799678	0.649372
4422	AA	m	1.12372	0.00484095	0.799452	1.05086	0.845406	0.478764	0.620446	0.395191	1.109	0.54609
4425	AA	f	0.985055	0.00649933	0.511244	0.824487	0.994963	0.670072	1.50147	0.683315	1.05518	0.737365
4426	GG	f	0.822608	1.57954	1.04397	1.17411	0.777932	1.6442	0.785333	1.09098	0.347277	0.856852
4428	AA	f	0.741375	0.00754379	1.57143	0.895999	1.22071	1.04782	0.646794	0.562772	1.06129	0.631615
4429	GG	m	0.731169	2.79821	1.26759	0.758683	0.33979	0.720659	0.742971	1.05382	1.05404	1.03805
4430	AA	m	1.67397	0.006213	1.1827	0.850609	1.35916	0.445158	1.33457	0.959679	NA	NA
4431	GG	m	1.06679	3.0727	0.603775	0.468645	1.03005	0.944346	1.26697	0.880029	0.566805	1.26477
4433	GG	f	1.14733	1.59605	0.497264	1.25838	1.49248	1.09231	1.32535	1.10621	1.26356	1.54448
4435	GG	f	1.38346	1.55241	0.78029	1.08415	1.01236	1.19946	1.37686	2.0288	1.08485	0.901532
4437	GG	f	1.87031		1.49701	0.563141			1.71877	1.38091	1.51308	1.31232
4441	AA	m	0.805679	0.00845785	0.847968	1.00805	1.05901	0.686527	1.82308	0.379093	0.641383	2.77447
4442	GG	m	0.794587		0.883978	0.725259	1.24204	1.2811	1.33921	2.29044	NA	NA
4444	AA	f	0.62342	0.00647684	0.905686	0.707876	0.863169	1.24607	0.883546	1.11005	0.875083	1.36647
4448	GG	m	1.12762	3.38582	0.686381	1.17411	0.869173	1.10373	0.651292	0.821096	NA	NA
4449	GG	f	0.935154	2.49581	1.24581	1.31637	0.954433	1.17886	0.437204	0.96301	NA	NA
4451	AA	f	1.12762	0.00682245	1.38711	1.46061	0.863169	0.827819	1.06539	1.29291	NA	NA
4460	GG	f	0.974866	1.33747	1.31229	0.599391	1.08878	1.56091	0.644556	1.5059	NA	NA
4462	AA	f	0.863505	0.00484095	0.94088	1.02923	1.11552	1.6442	0.516334	0.373874	NA	NA

## Sheet: Skin_Coloration
id	sex	genotype	age_week	norm_leg	norm_beak
4087	f	AA	26	1.1976	1.2907
4101	f	AA	26	1.31737	1.27326
4157	f	AA	26	1.22754	1.23837
4209	m	AA	26	2.03593	3.01744
4210	m	AA	26	NA	NA
4212	m	AA	26	NA	NA
4215	m	AA	26	NA	NA
4218	f	AA	26	1.39222	1.20349
4219	m	AA	26	1.91617	2.42442
4220	m	AA	26	NA	NA
4222	m	AA	26	NA	NA
4228	f	AA	26	1.25749	1.02907
4235	m	AA	26	2.39521	2.4593
4240	m	AA	26	1.94611	2.23256
4243	f	AA	26	1.31737	1.02907
4244	f	AA	26	1.34731	1.13372
4247	m	AA	26	2.11944	2.44413
4256	f	AA	26	1.36228	1.34302
4260	m	AA	26	NA	NA
4267	f	AA	26	1.49701	1.37791
4201	f	GG	26	1.00299	0.872093
4204	f	GG	26	1.06287	1.01163
4205	f	GG	26	NA	NA
4206	f	GG	26	1.15269	0.784884
4207	f	GG	26	NA	NA
4211	m	GG	26	NA	NA
4214	f	GG	26	0.703593	0.906977
4221	f	GG	26	1.18263	0.593023
4226	f	GG	26	0.988024	0.906977
4227	f	GG	26	1.16766	1.04651
4229	f	GG	26	0.883234	1.22093
4234	m	GG	26	NA	NA
4239	m	GG	26	NA	NA
4246	m	GG	26	0.993056	0.916223
4253	f	GG	26	NA	NA
4258	m	GG	26	0.868263	1.02907
4263	f	GG	26	0.913174	1.2907
4266	f	GG	26	1.06287	1.18605
4269	m	GG	26	NA	NA
4270	f	GG	26	1.0479	1.06395
4271	f	GG	26	1.00299	0.889535
4274	f	GG	26	0.973054	1.27326
4087	f	AA	23	1.96354	1.15385
4101	f	AA	23	NA	NA
4157	f	AA	23	2.25694	1.38462
4209	m	AA	23	NA	NA
4210	m	AA	23	NA	NA
4212	m	AA	23	NA	NA
4215	m	AA	23	NA	NA
4218	f	AA	23	2.23438	1
4219	m	AA	23	NA	NA
4220	m	AA	23	NA	NA
4222	m	AA	23	NA	NA
4228	f	AA	23	1.28646	0.692308
4235	m	AA	23	NA	NA
4240	m	AA	23	NA	NA
4243	f	AA	23	NA	NA
4244	f	AA	23	1.82812	1.4359
4247	m	AA	23	NA	NA
4256	f	AA	23	2.91146	1.28205
4260	m	AA	23	NA	NA
4267	f	AA	23	2.23438	1.46154
4201	f	GG	23	0.519097	1.28205
4204	f	GG	23	1.06076	0.948718
4205	f	GG	23	NA	NA
4206	f	GG	23	1.37674	1.07692
4207	f	GG	23	NA	NA
4211	m	GG	23	NA	NA
4214	f	GG	23	0.970486	0.641026
4221	f	GG	23	0.970486	1.17949
4226	f	GG	23	0.857639	1.02564
4227	f	GG	23	1.1059	1.05128
4229	f	GG	23	0.835069	0.794872
4234	m	GG	23	NA	NA
4239	m	GG	23	NA	NA
4246	m	GG	23	NA	NA
4253	f	GG	23	NA	NA
4258	m	GG	23	NA	NA
4263	f	GG	23	0.902778	1.17949
4266	f	GG	23	1.24132	0.923077
4269	m	GG	23	NA	NA
4270	f	GG	23	1.08333	0.974359
4271	f	GG	23	0.8125	1.05128
4274	f	GG	23	1.26389	0.871795
4087	f	AA	18	2.97523	2.5536
4101	f	AA	18	2.07692	0.8288
4157	f	AA	18	2.7927	3.3152
4209	m	AA	18	2.84746	2.7328
4210	m	AA	18	2.97523	2.7328
4212	m	AA	18	NA	NA
4215	m	AA	18	NA	NA
4218	f	AA	18	2.35463	2.464
4219	m	AA	18	2.62842	2.9344
4220	m	AA	18	NA	NA
4222	m	AA	18	NA	NA
4228	f	AA	18	2.93872	2.9344
4235	m	AA	18	3.24902	3.6512
4240	m	AA	18	2.73794	2.6656
4243	f	AA	18	2.66493	3.4048
4244	f	AA	18	2.97523	2.3968
4247	m	AA	18	2.97758	2.8463
4256	f	AA	18	3.35854	2.6656
4260	m	AA	18	NA	NA
4267	f	AA	18	3.19426	2.3968
4201	f	GG	18	NA	NA
4204	f	GG	18	0.894394	1.4784
4205	f	GG	18	NA	NA
4206	f	GG	18	0.894394	0.7168
4207	f	GG	18	NA	NA
4211	m	GG	18	NA	NA
4214	f	GG	18	1.31421	1.2096
4221	f	GG	18	0.857888	1.1648
4226	f	GG	18	0.839635	1.0528
4227	f	GG	18	0.949153	0.8288
4229	f	GG	18	0.638853	0.7616
4234	m	GG	18	NA	NA
4239	m	GG	18	NA	NA
4246	m	GG	18	1.19499	0.767442
4253	f	GG	18	NA	NA
4258	m	GG	18	1.07692	1.1872
4263	f	GG	18	0.876141	0.672
4266	f	GG	18	1.13168	1.0304
4269	m	GG	18	NA	NA
4270	f	GG	18	0.821382	1.68
4271	f	GG	18	1.29596	0.672
4274	f	GG	18	1.20469	0.8064
4087	f	AA	14	2.53364	1.97376
4101	f	AA	14	2.66937	1.88847
4157	f	AA	14	2.71462	1.81537
4209	m	AA	14	2.18677	1.90066
4210	m	AA	14	2.23202	2.11996
4212	m	AA	14	NA	NA
4215	m	AA	14	NA	NA
4218	f	AA	14	2.23202	1.81537
4219	m	AA	14	2.8051	1.76664
4220	m	AA	14	NA	NA
4222	m	AA	14	NA	NA
4228	f	AA	14	2.20186	2.10778
4235	m	AA	14	2.75986	2.05904
4240	m	AA	14	2.32251	1.83974
4243	f	AA	14	2.12645	1.90066
4244	f	AA	14	2.4884	2.13215
4247	m	AA	14	2.65411	1.80067
4256	f	AA	14	2.23202	2.0956
4260	m	AA	14	NA	NA
4267	f	AA	14	2.21694	1.99813
4201	f	GG	14	NA	NA
4204	f	GG	14	1.0406	1.18182
4205	f	GG	14	NA	NA
4206	f	GG	14	1.14617	0.877226
4207	f	GG	14	NA	NA
4211	m	GG	14	NA	NA
4214	f	GG	14	1.0406	1.09653
4221	f	GG	14	NA	NA
4226	f	GG	14	0.844548	0.938144
4227	f	GG	14	0.859629	0.986879
4229	f	GG	14	1.02552	0.925961
4234	m	GG	14	NA	NA
4239	m	GG	14	NA	NA
4246	m	GG	14	0.786885	1.01443
4253	f	GG	14	NA	NA
4258	m	GG	14	0.935035	0.999063
4263	f	GG	14	0.919954	1.0478
4266	f	GG	14	1.05568	0.962512
4269	m	GG	14	NA	NA
4270	f	GG	14	1.08585	0.828491
4271	f	GG	14	1.07077	1.1209
4274	f	GG	14	1.19142	1.03561
4087	f	AA	8	2.89178	1.84742
4101	f	AA	8	NA	NA
4157	f	AA	8	2.57916	2.33814
4209	m	AA	8	2.89178	2.82887
4210	m	AA	8	3.67335	3.57938
4212	m	AA	8	NA	NA
4215	m	AA	8	NA	NA
4218	f	AA	8	2.96994	2.30928
4219	m	AA	8	2.73547	1.90515
4220	m	AA	8	NA	NA
4222	m	AA	8	NA	NA
4228	f	AA	8	2.70942	2.39588
4235	m	AA	8	4.24649	3.40619
4240	m	AA	8	2.47495	2.28041
4243	f	AA	8	2.52705	3.20412
4244	f	AA	8	2.42285	2.8
4247	m	AA	8	2.21053	1.81472
4256	f	AA	8	3.17836	3.43505
4260	m	AA	8	NA	NA
4267	f	AA	8	2.81363	2.54021
4201	f	GG	8	NA	1.06804
4204	f	GG	8	0.859719	0.750515
4205	f	GG	8	NA	NA
4206	f	GG	8	1.2505	0.808247
4207	f	GG	8	NA	NA
4211	m	GG	8	NA	NA
4214	f	GG	8	0.98998	1.09691
4221	f	GG	8	NA	NA
4226	f	GG	8	1.12024	1.12577
4227	f	GG	8	0.807615	0.721649
4229	f	GG	8	0.677355	1.4433
4234	m	GG	8	NA	NA
4239	m	GG	8	NA	NA
4246	m	GG	8	0.901288	1.19431
4253	f	GG	8	NA	NA
4258	m	GG	8	0.98998	1.15464
4263	f	GG	8	1.30261	1.01031
4266	f	GG	8	1.51102	1.06804
4269	m	GG	8	NA	NA
4270	f	GG	8	0.833667	0.923711
4271	f	GG	8	0.781563	0.837113
4274	f	GG	8	0.963928	0.779381
4087	f	AA	4	NA	NA
4101	f	AA	4	NA	NA
4157	f	AA	4	NA	NA
4209	m	AA	4	1.70456	1.2302
4210	m	AA	4	2.19841	1.17822
4212	m	AA	4	2.0391	1.57673
4215	m	AA	4	1.62491	1.62871
4218	f	AA	4	1.95945	1.31683
4219	m	AA	4	1.84794	1.14356
4220	m	AA	4	2.16655	NA
4222	m	AA	4	1.73642	1.78465
4228	f	AA	4	2.16655	1.43812
4235	m	AA	4	1.92759	1.94059
4240	m	AA	4	1.68863	1.64604
4243	f	AA	4	1.97538	1.21287
4244	f	AA	4	1.84794	1.47277
4247	m	AA	4	2.10293	1.53263
4256	f	AA	4	2.0391	1.57673
4260	m	AA	4	2.29399	1.45545
4267	f	AA	4	2.05503	1.17822
4201	f	GG	4	1.22665	1.17822
4204	f	GG	4	1.03548	1.00495
4205	f	GG	4	1.11513	0.883663
4206	f	GG	4	0.748733	0.537129
4207	f	GG	4	1.01457	0.944056
4211	m	GG	4	1.00362	0.693069
4214	f	GG	4	0.764663	0.84901
4221	f	GG	4	0.892107	1.26485
4226	f	GG	4	0.98769	1.26485
4227	f	GG	4	1.05141	1.24752
4229	f	GG	4	1.08327	1.00495
4234	m	GG	4	0.764663	NA
4239	m	GG	4	0.923968	1.09158
4246	m	GG	4	0.926433	0.504348
4253	f	GG	4	1.01955	1.19554
4258	m	GG	4	0.923968	0.658416
4263	f	GG	4	1.03548	1.12624
4266	f	GG	4	1.13106	1.0396
4269	m	GG	4	1.16293	1.38614
4270	f	GG	4	1.08327	1.2995
4271	f	GG	4	1.11513	1.07426
4274	f	GG	4	1.01955	0.762376
4087	f	AA	2	NA	NA
4101	f	AA	2	NA	NA
4157	f	AA	2	NA	NA
4209	m	AA	2	1.30904	1.24067
4210	m	AA	2	1.2786	1.09414
4212	m	AA	2	1.12638	1.05506
4215	m	AA	2	1.30904	NA
4218	f	AA	2	1.17712	1.17229
4219	m	AA	2	1.19742	1.18206
4220	m	AA	2	1.24815	1.17229
4222	m	AA	2	1.31919	1.13321
4228	f	AA	2	1.18727	1.06483
4235	m	AA	2	1.42066	1.18206
4240	m	AA	2	1.0452	1.12345
4243	f	AA	2	1.38007	1.04529
4244	f	AA	2	1.33948	1.13321
4247	m	AA	2	1.26113	1.14553
4256	f	AA	2	1.41052	1.28952
4260	m	AA	2	1.16697	1.22114
4267	f	AA	2	1.13653	1.0746
4201	f	GG	2	0.801661	1.0746
4204	f	GG	2	1.0452	0.810835
4205	f	GG	2	1.0655	0.849911
4206	f	GG	2	1.02491	1.00622
4207	f	GG	2	0.955002	1.0098
4211	m	GG	2	0.97417	1.00622
4214	f	GG	2	0.933579	0.869449
4221	f	GG	2	1.08579	1.23091
4226	f	GG	2	0.913284	0.791297
4227	f	GG	2	1.0655	0.976909
4229	f	GG	2	1.03506	1.05506
4234	m	GG	2	0.943727	0.908526
4239	m	GG	2	1.16697	0.918295
4246	m	GG	2	0.989899	0.973124
4253	f	GG	2	0.953875	1.00622
4258	m	GG	2	1.0452	0.937833
4263	f	GG	2	0.964022	0.996448
4266	f	GG	2	0.872694	1.91474
4269	m	GG	2	1.10609	1.06483
4270	f	GG	2	0.903137	0.810835
4271	f	GG	2	1.12638	0.908526
4274	f	GG	2	1.01476	0.869449
4087	f	AA	1	NA	NA
4101	f	AA	1	NA	NA
4157	f	AA	1	NA	NA
4209	m	AA	1	1.1367	1.00704
4210	m	AA	1	1.08299	0.886934
4212	m	AA	1	1.1367	1.09943
4215	m	AA	1	1.21725	1.21029
4218	f	AA	1	1.10985	0.942367
4219	m	AA	1	1.07404	0.877695
4220	m	AA	1	1.1188	1.09943
4222	m	AA	1	0.939788	0.711395
4228	f	AA	1	1.1546	0.988561
4235	m	AA	1	1.1188	1.08095
4240	m	AA	1	1.1725	1.05323
4243	f	AA	1	1.14565	0.91465
4244	f	AA	1	1.10985	1.19182
4247	m	AA	1	1.23949	1.14012
4256	f	AA	1	1.2262	1.09019
4260	m	AA	1	1.16355	0.776067
4267	f	AA	1	1.02034	0.970084
4201	f	GG	1	1.02929	1.14562
4204	f	GG	1	1.04719	1.09019
4205	f	GG	1	0.993491	1.12714
4206	f	GG	1	1.1009	1.04399
4207	f	GG	1	1.0128	1.17264
4211	m	GG	1	1.02034	1.08095
4214	f	GG	1	1.00244	0.933128
4221	f	GG	1	1.01139	1.03476
4226	f	GG	1	1.16355	1.12714
4227	f	GG	1	1.00244	1.02552
4229	f	GG	1	1.09194	1.03476
4234	m	GG	1	1.03824	0.91465
4239	m	GG	1	1.02034	0.840739
4246	m	GG	1	0.835461	0.688318
4253	f	GG	1	0.96664	0.942367
4258	m	GG	1	1.02034	0.896172
4263	f	GG	1	0.823434	NA
4266	f	GG	1	0.895037	0.905411
4269	m	GG	1	1.04719	1.05323
4270	f	GG	1	0.930838	0.942367
4271	f	GG	1	1.01139	1.06247
4274	f	GG	1	0.939788	0.960845

## Sheet: Egg yolk (DSM)
id	genotype	1	2	3	4	5	6	7	8	9	10	11	12	13	14	15	16	17	18	19	20	21	22	23	24	25	26	27	28	29	30
4045	AA	10	11	9	9	9	9	10	9	9	10	10	9	9	10	10	9	10	10	10	10	10	9	9	9	9	9	10	9	9	8
4056	AA	10	9	9	9	9	9	9	8	9	8	8	8	8	8	8	8	8	8	8	8	8	7	8	8	8	7
4069	AA	10	10	11	10	10	9	10	9	9	10	9	9	9	9	9	9	8	9	8	8	9	8
4073	AA	11	11	11	10	11	10	10	10	10	10	10	10	9	10	10	10	10	10	9	9	9	9	9	9	10	9	8	9	8	8
4076	AA	10	10	10	9	9	10	9	9	9	9	9	9	9	9	9	9	9	9	8	8	8	7	8	8
4087	AA	9	9	9	9	8	9	9	9	9	9	9	9	9	9	9	9	9	9	9	9	9	9	9	8	8	8	7	8	8	8
4157	AA	10	9	9	10	10	10	10	10	9	9	10	9	9	9	9	9	9	9	10	10	9	9	9	9	9	8	8	8
4201	GG	9	9	8	8	8	8	8	8	8	8	8	7	7	7	8	8	8	7	8	8	8	7	8	8
4204	GG	10	8	9	8	9	9	9	9	8	8	8	8	8	8	8	7
4206	GG	10	10	9	8	8	8	8	9	9	9	9	9	9	8	8	8	8	8	8	8	8	8	8	8	8	8	9	8	8	9
4214	GG	9	10	9	8	8	9	9	9	9	8	9	8	8	8	8	8	8	9	8	9	9	9	8	8	9	9	8	8	8	8
4218	AA	10	10	9	10	9	9	9	9	9	9	9	9	8	9	8	8	8	8	8	8	8	8	8	8	8	8	8	8	8	8
4221	GG	8	8	8	8	8	8	8	8	8	8	8	8	8	8	8	8	8	8	8	8	8	8	8	8	8	8	9	7	8	8
4226	GG	9	9	9	9	9	9	9	9	9	9	9	9	9	9	8	8	8	8	8	8	8	8	8	8	9	9	9	9	8	8
4227	GG	10	9	9	9	9	9	8	9	8	8	9	9	9	8	8	8	8	9	9	9	8	8	8	9	9	8	8	8	8	8
4229	GG	8	8	9	9	9	9	9	9	9	8	8	9	8	8	8	8	8	8	8	8	8	8	8	8	8	8	8	8	8	7
4244	AA	9	10	10	9	9	9	9	9	9	8	8	8	8	9	9	9	9	9	9	8	9	8	8	8	9	9	8	8	8	8
4263	AA	10	9	9	9	9	10	10	9	10	9	9	9	9	9	9	9	9	10	10	10	10	9	9	9	9	9	8	8	8	8
4266	GG	9	9	9	9	9	8	8	8	8	7	7	7	7	7	8	8	8	8	8	8	8	8	8	8	9	8	8	7
4267	AA	9	9	9	9	9	9	9	9	9	8	8	8	8	8	9	8	8	8	8	7	8
4270	GG	8	8	9	9	9	9	9	9	8	8	9	9	8	9	8	8	8	7	8	8
4271	GG	8	8	7	7	6	6	6	6	6	6	7	6	8	7	7	7	7	8	8	8	8	8	8	8	8	8	7	8	7	8
4274	GG	8	8	8	7	7	7	7	8	8	8	8	7	7	6	6	8	7	7	8	8	8	8	8	8	8	8	7

## Sheet: Egg yolk (HPLC)
id	Genotype	sampling	Lutein	Zeaxanthin	Canthaxanthine
1	AA	1	31.9	7.01	2.61
2	AA	1	32.8	6.75	3.24
3	AA	1	36.6	8.04	2.47
4	AA	2	28.6	4.92	2
5	AA	2	17.8	2.18	2
6	AA	2	20	2.39	2
7	GG	2	7.25	2	2
8	GG	2	7.53	2	2
9	GG	2	6.41	2	2
10	GG	1	7.94	2	2
11	GG	1	14.1	2	2
12	GG	1	9.3	2	2
